# Supplementary material
Source: HighWire-hosted journal article supplement (https://thorax.bmj.com/content/thoraxjnl-2019-213149)
Supplement: inline-supplementary-material-1 [file inline-supplementary-material-1.pdf]

**ONLINE SUPPLEMENT**

**Timing of secondhand smoke, pet, dampness or mold exposure and lung function in adolescence.**

**Edith B Milanzi, Gerard H Koppelman, Henriette A Smit, Alet H Wijga, Judith M Vonk, Bert Brunekreef, and**

**Ulrike Gehring**

| Characteristics                         | Baseline<br>(N=3963) |      | Study population<br>(N=552) |      | P-value <sup>α</sup> | Lung function data at age 12,<br>but not at age 16 (N=740) <sup>α</sup> |      | P-value <sup>μ</sup> |
|-----------------------------------------|----------------------|------|-----------------------------|------|----------------------|-------------------------------------------------------------------------|------|----------------------|
|                                         | N                    | %    | N                           | %    |                      | N                                                                       | %    |                      |
| Parental allergy                        |                      |      |                             |      |                      |                                                                         |      |                      |
| Allergic mother                         | 1237/3963            | 31.2 | 178/552                     | 32.2 | 0.624                | 252/740                                                                 | 34.0 | 0.495                |
| Allergic father                         | 1217/3957            | 30.7 | 187/364                     | 33.9 | 0.130                | 229/740                                                                 | 30.9 | 0.255                |
| Boys                                    | 2054/3963            | 51.8 | 251/552                     | 45.4 | 0.002                | 383/740                                                                 | 51.1 | 0.025                |
| Presence of pets at 1 year              | 1719/3785            | 45.4 | 226/489                     | 41.1 | 0.009                | 314/650                                                                 | 42.6 | 0.600                |
| Dampness or molds at 1 year             | 312/3386             | 8.4  | 49/540                      | 9.1  | 0.243                | 47/723                                                                  | 6.5  | 0.087                |
| Breastfeeding > 12 weeks                | 1892/3896            | 48.5 | 330/552                     | 59.7 | <0.001               | 392/737                                                                 | 53.2 | 0.018                |
| Gas cooking at 3 months                 | 3247/3923            | 82.7 | 471/549                     | 85.8 | 0.076                | 599/737                                                                 | 81.2 | 0.032                |
| Maternal smoking during pregnancy       | 703/3920             | 17.8 | 68/548                      | 12.4 | 0.003                | 118/736                                                                 | 16.0 | 0.065                |
| Indoor SHS at 1 year                    | 1059/3963            | 27.7 | 109/552                     | 19.7 | <0.001               | 187/739                                                                 | 25.3 | 0.014                |
| Parental education                      |                      |      |                             |      | <0.001               |                                                                         |      | 0.001                |
| Low                                     | 502/3812             | 13.1 | 38/552                      | 6.8  |                      | 81/739                                                                  | 10.9 |                      |
| Intermediate                            | 1402/3812            | 36.7 | 167/552                     | 30.2 |                      | 263/739                                                                 | 35.5 |                      |
| High                                    | 1908/3812            | 50.1 | 347/552                     | 62.8 |                      | 395/739                                                                 | 53.4 |                      |
| Parental country of birth (Netherlands) | 3485/3700            | 94.1 | 530/545                     | 97.2 | 0.007                | 699/735                                                                 | 95.1 | 0.056                |

Table E1. Characteristics comparisons between baseline population and study population\*

Ω: Comparison between baseline population and study population

α: Excluded from population with successful lung function measurements at age 12 (N=1292) because of lack of lung function data at age 16

μ : Comparison between study population and excluded population with lung function data at age 12, but not at age 16

Characteristics compared using Chi-Square tests

| Number surveys with missing exposure data | N (%)      |
|-------------------------------------------|------------|
| <b>SHS</b>                                |            |
| 0                                         | 511 (92.6) |
| 1                                         | 33 (6.0)   |
| 2                                         | 5 (0.9)    |
| 3                                         | 3 (0.5)    |
| <b>Pets</b>                               |            |
| 0                                         | 515 (93.3) |
| 1                                         | 25 (4.5)   |
| 2                                         | 8 (1.4)    |
| 3                                         | 3 (0.5)    |
| 5                                         | 1 (0.2)    |
| <b>Dampness or mold</b>                   |            |
| 0                                         | 417 (75.5) |
| 1                                         | 119 (21.6) |
| 2                                         | 10 (1.8)   |
| 3                                         | 5 (0.9)    |
| 4                                         | 1 (0.2)    |

**Table E2. Completeness of exposure data from repeated surveys from birth until age 12**

| Characteristics                               | Pets              |                   | SHS              |                   | Dampness or mold        |                  |
|-----------------------------------------------|-------------------|-------------------|------------------|-------------------|-------------------------|------------------|
| Low education vs High education               | Very low          | 1.0               | Very low         | 1.00              | Very low                | 1.00             |
|                                               | Late childhood    | 0.9 (0.3 to 3.1)  | Early life       | 2.9 (1.1 to 8.1)  | Early life              | 0.9 (0.3 to 2.9) |
|                                               | Mid-childhood     | 0.8 (0.1 to 3.16) | Persistently low | 3.1 (1.2 to 8.6)  | Moderate late childhood | 0.8 (0.3 to 2.1) |
|                                               | Early life        | 0.8 (0.2 to 3.1)  | Childhood        | 5.3 (2.1 to 13.8) | Mid-childhood           | 0.5 (0.0 to 4.2) |
|                                               | Persistently high | 2.2 (1.0. to 4.8) |                  |                   |                         |                  |
| Intermediate education vs high education      | Very low          | 1.0               | Very low         | 1.00              | Very low                | 1.00             |
|                                               | Late childhood    | 0.9 (0.5 to 1.8)  | Early life       | 1.5 (0.8 to 2.9)  | Early life              | 1.0 (0.5 to 1.9) |
|                                               | Mid-childhood     | 1.2 (0.5 to 2.5)  | Persistently low | 1.2 (0.6 to 2.43) | Moderate late childhood | 0.6 (0.3 to 1.1) |
|                                               | Early life        | 1.9 (1.1 to 3.4)  | Childhood        | 2.9 (1.5 to 5.3)  | Mid-childhood           | 0.8 (0.3 to 2.1) |
|                                               | Persistently high | 2.1 (1.3 to 3.3)  |                  |                   |                         |                  |
| Parental allergy (Yes vs No)                  | Very low          | 1.0               | Very low         | 1.00              | Very low                | 1.00             |
|                                               | Late childhood    | 0.7 (0.4 to 1.2)  | Early life       | 0.5 (0.3 to 0.9)  | Early life              | 0.7 (0.4 to 1.3) |
|                                               | Mid-childhood     | 0.5 (0.2 to 1.0)  | Persistently low | 0.9 (0.4 to 1.6)  | Moderate late childhood | 0.8 (0.5 to 1.4) |
|                                               | Early life        | 0.9 (0.5 to 1.6)  | Childhood        | 0.5 (0.3 to 0.9)  | Mid-childhood           | 1.0 (0.4 to 2.4) |
|                                               | Persistently high | 0.5 (0.3 to 0.8)  |                  |                   |                         |                  |
| SHS exposure at 1 year (Yes vs No)            | Very low          | 1.0               | Very low         | 1.00              | Very low                | 1.00             |
|                                               | Late childhood    | 1.3 (0.6 to 2.7)  | Early life       |                   | Early life              | 1.2 (0.6 to 2.3) |
|                                               | Mid-childhood     | 1.4 (0.5 to 3.3)  | Persistently low |                   | Moderate late childhood | 1.0 (0.5 to 1.8) |
|                                               | Early life        | 3.0 (1.6 to 5.6)  | Childhood        |                   | Mid-childhood           | 0.8 (0.2to 2.4)  |
|                                               | Persistently high | 1.8 (1.1 to 3.1)  |                  |                   |                         |                  |
| Maternal smoking during pregnancy (Yes vs No) | Very low          | 1.0               | Very low         | 1.00              | Very low                | 1.00             |
|                                               | Late childhood    | 0.7 (0.2 to 2.3)  | Early life       |                   | Early life              | 1.2 (0.5 to 2.6) |
|                                               | Mid-childhood     | 1.8 (0.7 to 5..1) | Persistently low |                   | Moderate late childhood | 1.1 (0.5 to 2.3) |
|                                               | Early life        | 3.7 (1.7 to .7)   | Childhood        |                   | Mid-childhood           | 1.5 (0.5 to 4.5) |
|                                               | Persistently high | 2.0 (1.1 to 4.1)  |                  |                   |                         |                  |
| Gas cooking (Yes vs No)                       | Very low          | 1.0               | Very low         | 1.00              | Very low                | 1.00             |
|                                               | Late childhood    | 0.9 (0.4 to 2.1)  | Early life       | 2.0 (0.7 to 5.8)  | Early life              | 1.4 (0.5 to 3.4) |
|                                               | Mid-childhood     | 0.8 (0.3 to 2.1)  | Persistently low | 0.6 (0.3 to 1.3)  | Moderate late childhood | 0.8 (0.4 to 1.5) |
|                                               | Early life        | 0.9 (0.4 to 2.0)  | Childhood        | 1.0 (0.4 to 2.2)  | Mid-childhood           | 0.8 (0.2 to 2.4) |
|                                               | Persistently high | 1.2 (0.6 to 2.3)  |                  |                   |                         |                  |

**Table E3. Univariate associations of longitudinal exposure patterns with selected study characteristics presented as odds ratios (95% confidence interval).**

|                                           | AGE 12                 |                         | AGE 16                  |                         |
|-------------------------------------------|------------------------|-------------------------|-------------------------|-------------------------|
| % Difference in FEV <sub>1</sub> (95% CI) | CRUDE <sup>α</sup>     | ADJUSTED <sup>β</sup>   | CRUDE <sup>α</sup>      | ADJUSTED <sup>β</sup>   |
| <b>SHS</b>                                | N=552                  | N=526                   | N=552                   | N=526                   |
| Early life vs Very low                    | -1.02 (-2.53 to 0.52)  | -1.43 (-3.02 to 0.18 )  | 0.45 (-1.09 to 2.01 )   | 0.34 (-1.28 to 1.98 )   |
| Persistently low vs Very low              | -1.69 (-3.29 to -0.05) | -1.77 (-3.45 to -0.06 ) | -1.16 (-2.76 to 0.46 )  | -0.97 (-2.64 to 0.72 )  |
| Childhood vs Very low                     | -0.92 (-2.43 to 0.61)  | -0.95 (-2.57 to 0.69)   | -2.32 (-3.80 to -0.82 ) | -1.88 (-3.47 to -0.26 ) |
| <b>Pets</b>                               | N=552                  | N=524                   | N=552                   | N=524                   |
| Early life vs Very low                    | -0.85 (-2.14 to 0.46)  | -0.55 (-1.91 to 0.82)   | -0.49 (-1.78 to 0.83)   | 0.10 (-1.25 to 1.48)    |
| Mid-childhood vs Very low                 | 0.83 (-0.77 to 2.45)   | 1.32 (-0.34 to 3.00)    | -0.08 (-1.65 to 1.52)   | 0.91 (-0.73 to 2.57)    |
| Late childhood vs Very low                | 2.30 (0.94 to 3.68)    | 2.71 (1.26 to 4.18)     | 3.66 (2.29 to 5.05)     | 4.78 (3.32 to 6.27)     |
| Persistently high vs Very low             | 0.99 (-0.01 to 2.01)   | 1.31 (0.21 to 2.42)     | 0.55 (-0.47 to 1.57)    | 1.29 (0.19 to 2.39)     |
| <b>Dampness or mold</b>                   | N=552                  | N=534                   | N=552                   | N=534                   |
| Early life vs Very low                    | 2.10 (0.59 to 3.64)    | 2.28 (0.74 to 3.84 )    | -0.32 (-1.80 to 1.19)   | -0.21 (-1.72 to 1.32 )  |
| Moderate late childhood vs Very low       | -3.00 (-4.29 to -1.70) | -2.96 (-4.26 to -1.64 ) | -2.64 (-3.94 to -1.33)  | -2.77 (-4.08 to -1.44 ) |
| Mid-childhood vs Very low                 | -2.97 (-5.12 to -0.76) | -2.58 (-4.78 to -0.33)  | -2.00 (-4.20 to 0.24)   | -2.00 (-4.22 to 0.26 )  |
| <b>% Difference in FVC (95% CI)</b>       |                        |                         |                         |                         |
| <b>SHS</b>                                | N=552                  | N=526                   | N=552                   | N=526                   |
| Early life vs Very low                    | -1.67 (-3.08 to -0.24) | -2.17 (-3.65 to -0.67 ) | -0.69 (-1.98 to 0.62)   | -0.49 (-1.85 to 0.89 )  |
| Persistently low vs Very low              | -2.10 (-3.60 to -0.57) | -1.94 (-3.50 to -0.33)  | -1.21 (-2.56 to 0.17)   | -0.82 (-2.25 to 0.62 )  |
| Childhood vs Very low                     | -1.54 (-2.95 to -0.11) | -1.96 (-3.45 to -0.43 ) | -2.33 (-3.59 to -1.06)  | -1.82 (-3.18 to -0.44 ) |
| <b>Pets</b>                               | N=552                  | N=524                   | N=552                   | N=524                   |
| Early life vs Very low                    | 0.12 (-1.11 to 1.37)   | 0.21 (-1.07 to 1.51)    | -0.91 (-2.01 to 0.20)   | -0.51 (-1.66 to 0.66)   |
| Mid-childhood vs Very low                 | -0.25 (-1.74 to 1.26)  | 0.13 (-1.41 to 1.69)    | -0.91 (-2.24 to 0.43)   | -0.14 (-1.52 to 1.27)   |
| Late childhood vs Very low                | 2.36 (1.08 to 3.66)    | 2.26 (0.91 to 3.36)     | 1.34 (0.20 to 2.50)     | 2.21 (0.98 to 3.45)     |
| Persistently high vs Very low             | 0.71 (-0.24 to 1.66)   | 0.89 (-0.13 to 1.93)    | -0.27 (-1.12 to 0.60)   | 0.39 (-0.54 to 1.33)    |
| <b>Dampness or mold</b>                   | N=552                  | N=534                   | N=552                   | N=534                   |
| Early life vs Very low                    | 2.44 (1.00 to 3.89)    | 2.76 (1.31 to 4.24 )    | 0.62 (-0.65 to 1.90)    | 0.89 (-0.41 to 2.20)    |
| Moderate late childhood vs Very low       | -2.10 (-3.32 to -0.86) | -2.11 (-3.35 to -0.86 ) | -2.15 (-3.26 to -1.03)  | -2.36 (-3.48 to -1.22 ) |
| Mid-childhood vs Very low                 | -0.95 (-3.03 to 1.17)  | -0.67 (-2.77 to 1.48 )  | -1.26 (-3.14 to 0.66)   | -1.54 (-3.44 to 0.39 )  |

**Table E4.** Crude and adjusted associations of longitudinal patterns of SHS, pet, and dampness or mold exposure with FEV<sub>1</sub> and FVC at ages 12 and 16 presented as percent difference.

$\alpha$  Adjusted for sex, log transformations of height, weight and age at medical examination,  $\beta$  Adjusted for log transformations of height, weight and age at medical examination, parental education, maternal and paternal allergy, breastfeeding at 12 weeks, maternal smoking during pregnancy, average annual NO<sub>2</sub> exposure at birth address, birthweight, indoor SHS at 1 year (except in models with SHS exposure), use of gas for cooking at 3 months, dampness or mold in the child's home at 1 year (except in models with dampness or mold exposure), pets in the home at 1 year(except in models with pet exposure), respiratory infections in the past 3 weeks before medical examination.

|                                     | % difference in FEV <sub>1</sub> Growth/year (95% CI) |                         |          | % difference in FVC Growth/year (95% CI) |                         |          |
|-------------------------------------|-------------------------------------------------------|-------------------------|----------|------------------------------------------|-------------------------|----------|
|                                     | Girls                                                 | Boys                    | P-value* | Girls                                    | Boys                    | P-value* |
| <b>SHS</b>                          | N=283                                                 | N=241                   |          | N=283                                    | N=241                   |          |
| Early life vs Very low              | 0.08 (-0.28 to 0.43 )                                 | 0.68 (0.21 to 1.15 )    | 0.198    | -0.07 (-0.44 to 0.31 )                   | 0.86 (0.42 to 1.30 )    | 0.118    |
| Persistently low vs Very low        | -0.08 (-0.45 to 0.29 )                                | 0.61 (0.11 to 1.12 )    | 0.084    | 0.10 (-0.29 to 0.50 )                    | 0.59 (0.12 to 1.07 )    | 0.679    |
| Childhood vs Very low               | -0.56 (-0.89 to -0.24 )                               | -0.12 (-0.65 to 0.41 )  | 0.104    | -0.50 (-0.84 to -0.15 )                  | 0.53 (0.03 to 1.04 )    | 0.000    |
| <b>Pets</b>                         | N=283                                                 | N=241                   |          | N=283                                    | N=241                   |          |
| Early life vs Very low              | 0.24 (-0.05 to 0.53 )                                 | 0.08 (-0.33 to 0.49 )   | 0.599    | -0.01 (-0.32 to 0.30 )                   | -0.39 (-0.78 to 0.01 )  | 0.213    |
| Mid-childhood vs Very low           | -0.28 (-0.63 to 0.08 )                                | 0.14 (-0.34 to 0.61 )   | 0.005    | 0.01 (-0.31 to 0.34 )                    | -0.07 (-0.52 to 0.39 )  | 0.952    |
| Late childhood vs Very low          | 0.36 (0.05 to 0.66 )                                  | 0.94 (0.53 to 1.36 )    | 0.004    | -0.02 (-0.40 to 0.36 )                   | 0.04 (-0.36 to 0.43 )   | 0.818    |
| Persistently high vs Very low       | 0.02 (-0.21 to 0.24 )                                 | -0.21 (-0.54 to 0.13 )  | 0.215    | 0.01 (-0.23 to 0.25 )                    | -0.33 (-0.65 to -0.01 ) | 0.082    |
| <b>Dampness or mold</b>             | N=283                                                 | N=241                   |          | N=283                                    | N=241                   |          |
| Early life vs Very low              | -0.31 (-0.63 to 0.00 )                                | -1.02 (-1.47 to -0.57 ) | 0.003    | -0.21 (-0.54 to 0.12 )                   | -0.76 (-1.19 to -0.34 ) | 0.014    |
| Moderate late childhood vs Very low | -0.22 (-0.53 to 0.09 )                                | 0.48 (0.10 to 0.85 )    | 0.015    | -0.23 (-0.55 to 0.10 )                   | 0.29 (-0.07 to 0.65 )   | 0.004    |
| Mid-childhood vs Very low           | -0.25 (-0.78 to 0.28 )                                | 0.22 (-0.39 to 0.83 )   | 0.743    | 0.66 (-1.22 to -0.10 )                   | 0.06 (-0.52 to 0.64 )   | 0.237    |

**Table E5. Adjusted associations of longitudinal patterns of SHS, pet, and dampness or mold exposure with FEV<sub>1</sub> and FVC growth between age 12 and 16 stratified by sex. Associations are presented as percent difference in annual growth of FEV<sub>1</sub> and FVC.** annual percent difference in growth of FEV<sub>1</sub> and FVC

Adjusted for log transformations of differences in height, weight and age between the 12 and 16 year lung function measurements, parental education, maternal and paternal allergy, breastfeeding at 12 weeks, maternal smoking during pregnancy, average annual NO<sub>2</sub> exposure at birth address, birthweight, indoor SHS at 1 year (except in models with SHS exposure), use of gas for cooking at 3 months, dampness or mold in the child's home at 1 year except in models with dampness or mold exposure, pets in the home at 1 year(except in models with pet exposure), respiratory infections in the past 3 weeks before medical examination

\*P-value of interaction terms

| % Difference in FEV <sub>1</sub> (95% CI) | AGE 12                  |                         | P-value* | AGE 16                  |                        | P-value* |
|-------------------------------------------|-------------------------|-------------------------|----------|-------------------------|------------------------|----------|
|                                           | Girls                   | Boys                    |          | Girls                   | Boys                   |          |
| <b>SHS</b>                                | N=283                   | N=241                   |          | N=283                   | N=241                  |          |
| Early life vs Very low                    | -0.91 (-2.99 to 1.22 )  | -2.23 (-4.64 to 0.23 )  | 0.278    | 0.42 (-1.73 to 2.61 )   | 0.69 (-1.74 to 3.18 )  | 0.735    |
| Persistently low vs Very low              | -2.39 (-4.55 to -0.18 ) | 0.15 (-2.49 to 2.87 )   | 0.401    | -3.87 (-6.00 to -1.70 ) | 2.83 (0.17 to 5.55 )   | 0.004    |
| Childhood vs Very low                     | -1.71 (-3.61 to 0.23 )  | -1.01 (-3.83 to 1.89 )  | 0.904    | -3.35 (-5.25 to -1.40 ) | -0.75 (-3.48 to 2.05 ) | 0.217    |
| <b>Pets</b>                               | N=283                   | N=241                   |          | N=283                   | N=241                  |          |
| Early life vs Very low                    | -1.87 (-3.52 to -0.19 ) | 0.31 (-1.88 to 2.54 )   | 0.139    | -0.63 (-2.33 to 1.10 )  | 0.89 (-1.24 to 3.07 )  | 0.136    |
| Mid-childhood vs Very low                 | 1.73 (-0.44 to 3.94 )   | 2.60 (0.00 to 5.27 )    | 0.226    | 0.02 (-2.12 to 2.20 )   | 3.20 (0.71 to 5.76 )   | 0.040    |
| Late childhood vs Very low                | 1.57 (-0.25 to 3.42 )   | 3.88 (1.59 to 6.23 )    | 0.047    | 2.56 (0.67 to 4.49 )    | 8.42 (6.14 to 10.74 )  | <0.001   |
| Persistently high vs Very low             | 1.82 (0.48 to 3.18 )    | 0.20 (-1.57 to 2.01 )   | 0.322    | 1.79 (0.41 to 3.18 )    | 0.69 (-1.06 to 2.47 )  | 0.463    |
| <b>Dampness or mold</b>                   | N=283                   | N=241                   |          | N=283                   | N=241                  |          |
| Early life vs Very low                    | 1.94 (0.04 to 3.88 )    | 2.47 (-0.00 to 5.01 )   | 0.688    | 0.33 (-1.58 to 2.27 )   | -0.52 (-2.87 to 1.89 ) | 0.668    |
| Moderate late childhood vs Very low       | -2.86 (-4.63 to -1.06 ) | -3.04 (-4.98 to -1.06 ) | 0.013    | -3.95 (-5.72 to -2.15 ) | -1.89 (-3.84 to 0.11 ) | 0.135    |
| Mid-childhood vs Very low                 | -4.20 (-7.25 to -1.05 ) | -1.82 (-5.01 to 1.48 )  | 0.023    | -3.98 (-7.13 to -0.72 ) | -0.20 (-3.41 to 3.11 ) | 0.079    |
| <b>% Difference in FVC (95% CI)</b>       |                         |                         |          |                         |                        |          |
| <b>SHS</b>                                | (N=253)                 | (N=213)                 |          | (N=253)                 | (N=213)                |          |
| Early life vs Very low                    | 0.06 (-1.97 to 2.13 )   | -5.15 (-7.28 to -2.97 ) | 0.001    | 0.59 (-1.27 to 2.49 )   | -1.83 (-3.83 to 0.20 ) | 0.089    |
| Persistently low vs Very low              | -2.00 (-4.10 to 0.14 )  | -0.81 (-3.20 to 1.64 )  | 0.760    | -2.20 (-4.08 to -0.28 ) | 1.31 (-0.89 to 3.56 )  | 0.147    |
| Childhood vs Very low                     | -1.11 (-2.95 to 0.78 )  | -3.98 (-6.47 to -1.42 ) | 0.007    | -2.62 (-4.29 to -0.93 ) | -1.54 (-3.82 to 0.80 ) | 0.555    |
| <b>Pets</b>                               | (N=254)                 | (N=212)                 |          | (N=254)                 | (N=212)                |          |
| Early life vs Very low                    | -0.60 (-2.23 to 1.05 )  | 1.16 (-0.86 to 3.22 )   | 0.340    | -0.31 (-1.79 to 1.20 )  | -0.29 (-2.09 to 1.54 ) | 0.530    |
| Mid-childhood vs Very low                 | 1.55 (-0.55 to 3.70 )   | -0.43 (-2.75 to 1.94 )  | 0.490    | 1.12 (-0.75 to 3.04 )   | -0.28 (-2.34 to 1.83 ) | 0.305    |
| Late childhood vs Very low                | 1.99 (0.22 to 3.80 )    | 1.86 (-0.20 to 3.96 )   | 0.767    | 1.67 (0.04 to 3.32 )    | 3.15 (1.29 to 5.04 )   | 0.198    |
| Persistently high vs Very low             | 0.81 (-0.48 to 2.12 )   | 0.68 (-0.96 to 2.34 )   | 0.989    | 0.81 (-0.38 to 2.00 )   | 0.25 (-1.24 to 1.76 )  | 0.780    |
| <b>Dampness or mold</b>                   | (N=260)                 | (N=216)                 |          | (N=260)                 | (N=216)                |          |
| Early life vs Very low                    | 2.16 (0.31 to 4.03 )    | 2.95 (0.68 to 5.28 )    | 0.343    | 1.03 (-0.63 to 2.72 )   | 0.79 (-1.20 to 2.83 )  | 0.872    |
| Moderate late childhood vs Very low       | -2.87 (-4.58 to -1.13 ) | -1.69 (-3.49 to 0.14 )  | 0.396    | -3.88 (-5.41 to -2.33 ) | -1.49 (-3.14 to 0.19 ) | 0.022    |
| Mid-childhood vs Very low                 | -2.91 (-5.90 to 0.17 )  | 0.41 (-2.57 to 3.49 )   | 0.162    | -4.26 (-6.98 to -1.47 ) | 0.55 (-2.16 to 3.34 )  | 0.005    |

**Table E6. Adjusted associations of longitudinal patterns of SHS, pet, and dampness or mold exposure with FEV<sub>1</sub> and FVC at ages 12 and 16 stratified by sex presented as percent difference.**

Adjusted for log transformations of height, weight and age at medical examination, parental education, maternal and paternal allergy, breastfeeding at 12 weeks, maternal smoking during pregnancy, average annual NO<sub>2</sub> exposure at birth address, birthweight, indoor SHS at 1 year (except in models with SHS exposure), use of gas for cooking at



3 months, dampness or mold in the child's home at 1 year except in models with dampness or mold exposure, pets in the home at 1 year(except in models with pet exposure), respiratory infections in the past 3 weeks before medical examination. \*P-value of interaction terms

|                                     | % difference in FEV <sub>1</sub> growth/year (95% CI) |                         | P-Value* | %difference in FVC growth/year (95% CI) |                         | P-Value* |
|-------------------------------------|-------------------------------------------------------|-------------------------|----------|-----------------------------------------|-------------------------|----------|
|                                     | Non-allergic parents                                  | Allergic parents        |          | Non-allergic parents                    | Allergic parents        |          |
| <b>SHS</b>                          | N=235                                                 | N=291                   |          | N=235                                   | N=291                   |          |
| Early life vs Very low              | 0.23 (-0.18 to 0.65 )                                 | 0.38 (-0.09 to 0.85 )   | 0.979    | 0.20 (-0.18 to 0.58 )                   | 0.44 (-0.03 to 0.91 )   | 0.241    |
| Persistently low vs Very low        | -0.04 (-0.52 to 0.43 )                                | 0.48 (0.05 to 0.91 )    | 0.095    | 0.01 (-0.43 to 0.46 )                   | 0.52 (0.08 to 0.95 )    | 0.984    |
| Childhood vs Very low               | -0.41 (-0.82 to -0.01 )                               | -0.31 (-0.76 to 0.15 )  | 0.985    | 0.09 (-0.28 to 0.47 )                   | -0.19 (-0.65 to 0.28 )  | 0.486    |
| <b>Pets</b>                         | N=234                                                 | N=290                   |          | N=234                                   | N=290                   |          |
| Early life vs Very low              | -0.00 (-0.41 to 0.40 )                                | -0.08 (-0.41 to 0.25 )  | 0.385    | -0.37 (-0.74 to 0.01 )                  | -0.24 (-0.58 to 0.09 )  | 0.902    |
| Mid-childhood vs Very low           | -0.33 (-0.75 to 0.09 )                                | 0.22 (-0.22 to 0.66 )   | 0.078    | -0.49 (-0.88 to -0.10 )                 | 0.47 (0.02 to 0.92 )    | 0.001    |
| Late childhood vs Very low          | 0.13 (-0.25 to 0.51 )                                 | 0.74 (0.38 to 1.11 )    | 0.035    | -0.25 (-0.60 to 0.10 )                  | -0.01 (-0.38 to 0.36 )  | 0.545    |
| Persistently high vs Very low       | 0.11 (-0.18 to 0.41 )                                 | -0.60 (-0.88 to -0.31 ) | 0.000    | -0.22 (-0.49 to 0.05 )                  | -0.38 (-0.66 to -0.09 ) | 0.173    |
| <b>Dampness or mold</b>             | N=241                                                 | N=293                   |          | N=241                                   | N=293                   |          |
| Early life vs Very low              | -0.73 (-1.12 to -0.34 )                               | -0.79 (-1.19 to -0.39 ) | 0.581    | -0.56 (-0.92 to -0.20 )                 | -0.46 (-0.86 to -0.05 ) | 0.710    |
| Moderate late childhood vs Very low | 0.19 (-0.18 to 0.55 )                                 | -0.05 (-0.40 to 0.30 )  | 0.385    | 0.10 (-0.23 to 0.44 )                   | -0.17 (-0.52 to 0.19 )  | 0.470    |
| Mid-childhood vs Very low           | -0.04 (-0.66 to 0.58 )                                | 0.05 (-0.51 to 0.61 )   | 0.862    | -0.46 (-1.03 to 0.12 )                  | -0.13 (-0.69 to 0.44 )  | 0.307    |

**Table E7. Associations of SHS, pet, and dampness or mold exposure with FEV<sub>1</sub> and FVC growth between age 12 and 16 stratified by parental allergy. Associations are presented as percent difference in annual growth of FEV<sub>1</sub> and FVC.**

Adjusted for log transformations of differences in height, weight and age at medical examination, parental education, breastfeeding at 12 weeks, maternal smoking during pregnancy, average annual NO<sub>2</sub> exposure at birth address, birthweight, SHS at 1 year (except in models with SHS exposure), use of gas for cooking at 3 months, dampness or mold in the child's home at 1 year (except in models with dampness or mold exposure), pets in the home at 1 year(except in models with pet exposure), respiratory infections in the past 3 weeks before medical examination.

\*P-value of interaction terms

|                                        | Non-allergic parents    | Allergic parents        | P-value* | Non-allergic parents    | Allergic parents        | P-value* |
|----------------------------------------|-------------------------|-------------------------|----------|-------------------------|-------------------------|----------|
| <b>% Difference in FEV<sub>1</sub></b> | <b>12 years</b>         |                         |          | <b>16 years</b>         |                         |          |
| <b>SHS</b>                             | N=235                   | N=292                   |          | N=235                   | N=292                   |          |
| Early life vs Very low                 | -0.25 (-2.33 to 1.87 )  | -3.26 (-5.72 to -0.75 ) | 0.055    | 2.41 (0.10 to 4.76 )    | -2.16 (-4.52 to 0.26 )  | 0.005    |
| Persistently low vs Very low           | -0.58 (-3.01 to 1.91 )  | -1.92 (-4.24 to 0.46 )  | 0.471    | -0.15 (-2.77 to 2.54 )  | -1.27 (-3.45 to 0.96 )  | 0.643    |
| Childhood vs Very low                  | -1.13 (-3.17 to 0.95 )  | -0.63 (-3.15 to 1.97 )  | 0.860    | -2.22 (-4.36 to -0.03 ) | -0.75 (-3.16 to 1.72 )  | 0.641    |
| <b>% Difference in FVC</b>             |                         |                         |          |                         |                         |          |
| Early life vs Very low                 | -0.52 (-2.41 to 1.41 )  | -4.48 (-6.79 to -2.12 ) | 0.001    | 1.93 (0.00 to 3.89 )    | -3.00 (-5.00 to -0.96 ) | 0.000    |
| Persistently low vs Very low           | 0.20 (-2.03 to 2.48 )   | -3.64 (-5.82 to -1.42 ) | 0.006    | 0.90 (-1.32 to 3.17 )   | -2.35 (-4.19 to -0.47 ) | 0.002    |
| Childhood vs Very low                  | -2.40 (-4.23 to -0.54 ) | -0.96 (-3.36 to 1.50 )  | 0.587    | -1.76 (-3.57 to 0.08 )  | -1.12 (-3.17 to 0.98 )  | 0.871    |
| <b>Pets</b>                            | N=234                   | N=291                   |          | N=234                   | N=291                   |          |
| <b>% Difference in FEV<sub>1</sub></b> |                         |                         |          |                         |                         |          |
| Early life vs Very low                 | 2.40 (0.32 to 4.52 )    | -2.05 (-3.83 to -0.23 ) | 0.001    | 3.09 (0.80 to 5.43 )    | -1.61 (-3.31 to 0.11 )  | 0.000    |
| Mid-childhood vs Very low              | 4.23 (2.00 to 6.51 )    | -1.10 (-3.49 to 1.35 )  | 0.000    | 3.85 (1.46 to 6.29 )    | -1.30 (-3.54 to 1.00 )  | 0.001    |
| Late childhood vs Very low             | 4.05 (2.03 to 6.11 )    | 1.64 (-0.37 to 3.69 )   | 0.253    | 4.74 (2.56 to 6.96 )    | 5.23 (3.26 to 7.24 )    | 0.664    |
| Persistently high vs Very low          | 1.64 (0.14 to 3.16 )    | 0.99 (-0.59 to 2.60 )   | 0.372    | 2.77 (1.11 to 4.46 )    | -0.00 (-1.48 to 1.50 )  | 0.007    |
| <b>% Difference in FVC</b>             |                         |                         |          |                         |                         |          |
| Early life vs Very low                 | 3.92 (2.01 to 5.87 )    | -1.92 (-3.63 to -0.17 ) | <0.001   | 3.56 (1.63 to 5.52 )    | -2.25 (-3.71 to -0.78 ) | <0.001   |
| Mid-childhood vs Very low              | 2.32 (0.34 to 4.34 )    | -2.17 (-4.44 to 0.15 )  | 0.000    | 1.97 (0.01 to 3.98 )    | -1.76 (-3.70 to 0.21 )  | 0.009    |
| Late childhood vs Very low             | 3.63 (1.80 to 5.48 )    | 0.91 (-1.00 to 2.86 )   | 0.045    | 3.58 (1.78 to 5.41 )    | 1.17 (-0.47 to 2.84 )   | 0.096    |
| Persistently high vs Very low          | 1.77 (0.40 to 3.15 )    | -0.10 (-1.60 to 1.43 )  | 0.037    | 2.15 (0.77 to 3.55 )    | -0.78 (-2.05 to 0.50 )  | 0.003    |
| <b>Dampness or mold.</b>               | N=241                   | N=294                   |          | N=241                   | N=294                   |          |
| <b>% Difference in FEV<sub>1</sub></b> |                         |                         |          |                         |                         |          |
| Early life vs Very low                 | 0.80 (-1.20 to 2.84 )   | 3.53 (1.24 to 5.86 )    | 0.036    | -1.72 (-3.83 to 0.43 )  | 1.37 (-0.78 to 3.56 )   | 0.057    |
| Moderate late childhood vs Very low    | -4.37 (-6.17 to -2.54 ) | -1.34 (-3.22 to 0.57 )  | 0.018    | -3.38 (-5.33 to -1.38 ) | -2.38 (-4.19 to -0.54 ) | 0.444    |
| Mid-childhood vs Very low              | -0.16 (-3.39 to 3.18 )  | -4.74 (-7.66 to -1.72 ) | 0.006    | 0.37 (-3.10 to 3.97 )   | -4.42 (-7.25 to -1.50 ) | 0.018    |
| <b>% Difference in FVC</b>             |                         |                         |          |                         |                         |          |
| Early life vs Very low                 | 3.30 (1.45 to 5.18 )    | 2.29 (0.12 to 4.51 )    | 0.494    | 1.31 (-0.50 to 3.16 )   | 0.82 (-1.01 to 2.68 )   | 0.816    |
| Moderate late childhood vs Very low    | -3.32 (-4.96 to -1.65 ) | -0.68 (-2.50 to 1.18 )  | 0.017    | -2.91 (-4.56 to -1.24 ) | -1.70 (-3.26 to -0.12 ) | 0.171    |
| Mid-childhood vs Very low              | 2.04 (-0.93 to 5.11 )   | -2.45 (-5.33 to 0.51 )  | 0.021    | 0.04 (-2.86 to 3.02 )   | -2.85 (-5.32 to -0.31 ) | 0.165    |

**Table E8. Adjusted associations of SHS, pet, and dampness or mold exposure with FEV<sub>1</sub> and FVC at ages 12 and 16 stratified by parental allergy. Associations are presented as percent difference.**

Adjusted for log transformations of height, weight and age at medical examination, parental education, breastfeeding at 12 weeks, maternal smoking during pregnancy, average annual NO<sub>2</sub> exposure at birth address, birthweight, indoor SHS at 1 year (except in models with SHS exposure), use of gas for cooking at 3 months, dampness or mold

in the child's home at 1 year except in models with dampness or mold exposure, pets in the home at 1 year(except in models with pet exposure), respiratory infections in the past 3 weeks before medical examination.

\*P-value of interaction terms

| N=212                               | % difference in FEV <sub>1</sub> growth/year (95% CI) | % difference in FVC growth/year (95% CI) |
|-------------------------------------|-------------------------------------------------------|------------------------------------------|
| SHS                                 |                                                       |                                          |
| Early life vs Very low              | 0.15 (-0.33 to 0.64 )                                 | 0.52 (0.04 to 1.01 )                     |
| Persistently low vs Very low        | 0.54 (-0.00 to 1.09 )                                 | 0.64 (0.10 to 1.19 )                     |
| Childhood vs Very low               | -1.04 (-1.50 to -0.58 )                               | -0.87 (-1.32 to -0.41 )                  |
| Pets                                |                                                       |                                          |
| Early life vs Very low              | 0.73 (0.37 to 1.09 )                                  | -0.15 (-0.50 to 0.20 )                   |
| Mid-childhood vs Very low           | -0.11 (-0.58 to 0.36 )                                | -0.46 (-0.93 to 0.01 )                   |
| Late childhood vs Very low          | 0.57 (0.18 to 0.96 )                                  | -0.12 (-0.50 to 0.27 )                   |
| Persistently high vs Very low       | -0.29 (-0.57 to -0.01 )                               | -0.32 (-0.60 to -0.04 )                  |
| Dampness or mold N=215              |                                                       |                                          |
| Early life vs Very low              | -0.71 (-1.13 to -0.29 )                               | -0.04 (-0.46 to 0.38 )                   |
| Moderate late childhood vs Very low | 0.24 (-0.10 to 0.57 )                                 | 0.06 (-0.26 to 0.40 )                    |
| Mid-childhood vs Very low           | 0.29 (-0.44 to 1.02 )                                 | -0.07 (-0.78 to 0.65 )                   |

**Table E9. Adjusted associations of SHS, pet, and dampness or mold exposure with FEV<sub>1</sub> and FVC growth between age 12 and 16 excluding participants with respiratory infections during the 3 weeks preceding lung function measurements. Associations are presented as percent difference in annual growth of FEV<sub>1</sub> and FVC.**

Associations adjusted for sex, log transformation of differences in height, weight and age between the 12 and 16 year lung function measurements, parental education, maternal and paternal allergy, breastfeeding at 12 weeks, maternal smoking during pregnancy, average annual NO<sub>2</sub> exposure at birth address, birthweight, indoor SHS at 1 year, use of gas for cooking at 3 months, dampness or mold in the child’s home at 1 year, pets in the home at 1 year.

|                                     | % Difference in FEV <sub>1</sub> (95% CI) |                         | % Difference in FVC (95% CI) |                         |
|-------------------------------------|-------------------------------------------|-------------------------|------------------------------|-------------------------|
|                                     | AGE 12                                    | AGE 16                  | AGE 12                       | AGE 16                  |
| <b>SHS</b>                          | N=350                                     | N=307                   | N=350                        | N=307                   |
| Early life vs Very low              | -1.34 (-3.27 to 0.62 )                    | -0.63 (-2.60 to 1.39 )  | -3.33 (-5.20 to -1.43 )      | -1.03 (-2.77 to 0.73 )  |
| Persistently low vs Very low        | -1.80 (-3.87 to 0.31 )                    | -2.43 (-4.50 to -0.32 ) | -0.71 (-2.78 to 1.41 )       | -2.13 (-3.96 to -0.27 ) |
| Childhood vs Very low               | -0.35 (-2.24 to 1.58 )                    | -2.69 (-4.79 to -0.54 ) | -0.00 (-1.89 to 1.92 )       | -1.84 (-3.71 to 0.07 )  |
| <b>Pets</b>                         | N=370                                     | N=319                   | N=370                        | N=319                   |
| Early life vs Very low              | -1.33 (-2.82 to 0.19 )                    | -0.25 (-1.92 to 1.45 )  | -0.70 (-2.19 to 0.82 )       | -2.23 (-3.68 to -0.77 ) |
| Mid-childhood vs Very low           | 0.17 (-1.85 to 2.22 )                     | -0.78 (-2.88 to 1.36 )  | -2.72 (-4.66 to -0.73 )      | -2.42 (-4.24 to -0.57 ) |
| Late childhood vs Very low          | 3.94 (2.26 to 5.65 )                      | 2.23 (0.38 to 4.11 )    | 2.69 (1.04 to 4.37 )         | -0.40 (-1.99 to 1.22 )  |
| Persistently high vs Very low       | 1.31 (0.04 to 2.59 )                      | 1.07 (-0.26 to 2.42 )   | 0.70 (-0.55 to 1.98 )        | -0.16 (-1.32 to 1.01 )  |
| <b>Dampness or mold</b>             | N=356                                     | N=311                   | N=356                        | N=311                   |
| Early life vs Very low              | 2.63 (0.86 to 4.43 )                      | -1.44 (-3.42 to 0.59 )  | 3.03 (1.26 to 4.82 )         | -0.49 (-2.27 to 1.32 )  |
| Moderate late childhood vs Very low | -3.46 (-4.86 to -2.04 )                   | -2.29 (-3.83 to -0.72 ) | -2.74 (-4.14 to -1.32 )      | -2.95 (-4.31 to -1.57 ) |
| Mid-childhood vs Very low           | -3.93 (-7.04 to -0.72 )                   | -5.83 (-8.41 to -3.18 ) | -1.43 (-4.60 to 1.85 )       | -4.21 (-6.54 to -1.83 ) |

0 **Table E10. Adjusted associations of SHS, pet, and dampness or mold exposure with FEV<sub>1</sub> and FVC at ages 12 and 16 excluding participants with respiratory infections**  
1 **during the 3 weeks preceding the lung function measurements. Associations are presented as percent difference in FEV<sub>1</sub> and FVC.**

2 Associations adjusted for sex, difference in height, weight and age between the 12 and 16 year lung function measurements, parental education, maternal and paternal  
3 allergy, breastfeeding at 12 weeks, maternal smoking during pregnancy, average annual NO<sub>2</sub> exposure at birth address, birthweight, indoor SHS at 1 year, use of gas for  
4 cooking at 3 months, dampness or mold in the child’s home at 1 year, pets in the home at 1 year.

5

|                                     | % Difference in FEV <sub>1</sub> (95% CI) |                         | % FEV <sub>1</sub> growth (95% CI) |
|-------------------------------------|-------------------------------------------|-------------------------|------------------------------------|
|                                     | AGE 12                                    | AGE 16                  |                                    |
| SHS                                 |                                           |                         |                                    |
| Early life vs Very low              | -1.63 (-3.48 to 0.25 )                    | 0.17 (-1.66 to 2.03 )   | 0.42 (0.05 to 0.81 )               |
| Persistently low vs Very low        | -2.34 (-4.13 to -0.50 )                   | -1.35 (-3.12 to 0.46 )  | 0.29 (-0.08 to 0.66 )              |
| Childhood vs Very low               | -0.74 (-2.47 to 1.03 )                    | -1.75 (-3.42 to -0.05 ) | -0.53 (-0.88 to -0.18 )            |
| Pets                                |                                           |                         |                                    |
| Early life vs Very low              | -0.25 (-1.85 to 1.37 )                    | 1.05 (-0.51 to 2.64 )   | 0.19 (-0.12 to 0.50 )              |
| Mid-childhood vs Very low           | 1.66 (-0.15 to 3.49 )                     | 1.38 (-0.38 to 3.16 )   | -0.17 (-0.51 to 0.18 )             |
| Late childhood vs Very low          | 2.24 (0.73 to 3.77 )                      | 4.03 (2.53 to 5.54 )    | 0.38 (0.09 to 0.67 )               |
| Persistently high vs Very low       | 0.88 (-0.31 to 2.09 )                     | 1.13 (-0.04 to 2.31 )   | -0.14 (-0.37 to 0.09 )             |
| Dampness or mold                    |                                           |                         |                                    |
| Early life vs Very low              | 2.64 (0.96 to 4.35 )                      | 0.20 (-1.42 to 1.84 )   | -0.74 (-1.05 to -0.43 )            |
| Moderate late childhood vs Very low | -3.11 (-4.52 to -1.68 )                   | -2.29 (-3.69 to -0.88 ) | 0.15 (-0.13 to 0.43 )              |
| Mid-childhood vs Very low           | -2.01 (-4.35 to 0.39 )                    | -2.00 (-4.28 to 0.35 )  | -0.28 (-0.73 to 0.18 )             |
|                                     | % Difference in FVC (95% CI)              |                         | % FVC growth (95% CI)              |
|                                     | AGE 12                                    | AGE 16                  |                                    |
| SHS                                 |                                           |                         |                                    |
| Early life vs Very low              | -3.77 (-5.52 to -1.99 )                   | -1.87 (-3.48 to -0.23 ) | 0.46 (0.09 to 0.82 )               |
| Persistently low vs Very low        | -1.98 (-3.73 to -0.20 )                   | -1.78 (-3.37 to -0.17 ) | 0.06 (-0.30 to 0.41 )              |
| Childhood vs Very low               | -1.29 (-2.95 to 0.41 )                    | -1.59 (-3.10 to -0.06 ) | -0.35 (-0.68 to -0.01 )            |
| Pets                                |                                           |                         |                                    |
| Early life vs Very low              | 0.30 (-1.26 to 1.88 )                     | 0.14 (-1.27 to 1.56 )   | -0.16 (-0.47 to 0.14 )             |
| Mid-childhood vs Very low           | 1.11 (-0.64 to 2.87 )                     | 0.79 (-0.79 to 2.39 )   | -0.19 (-0.53 to 0.15 )             |
| Late childhood vs Very low          | 1.08 (-0.37 to 2.54 )                     | 1.42 (0.10 to 2.75 )    | -0.07 (-0.35 to 0.21 )             |
| Persistently high vs Very low       | 0.23(-0.29 to 1.39)                       | -0.15 (-1.20 to 0.90 )  | -0.32 (-0.55 to -0.10 )            |
| Dampness or mold                    |                                           |                         |                                    |
| Early life vs Very low              | 3.01 (1.38 to 4.68 )                      | 1.31 (-0.16 to 2.80 )   | -0.57 (-0.87 to -0.26 )            |
| Moderate late childhood vs Very low | -2.00 (-3.38 to -0.61 )                   | -2.07 (-3.32 to -0.80 ) | -0.02 (-0.29 to 0.25 )             |
| Mid-childhood vs Very low           | 1.46 (-0.89 to 3.86 )                     | -1.04 (-3.11 to 1.08 )  | -0.73 (-1.17 to -0.29 )            |

**Table E11. Adjusted associations of longitudinal patterns of SHS, pet, and dampness or mold exposure with FEV<sub>1</sub> and FVC at ages 12 and 16 and FEV<sub>1</sub> and FVC growth between 12 and 16 years excluding childhood asthmatics (until age 8) and those who avoided pets due to family allergies (N=129). Associations are presented as percent difference in FEV<sub>1</sub> and FVC.**

10 Adjusted for sex, log transformations of height, weight and age at medical examination, parental education, maternal and paternal allergy, breastfeeding at 12 weeks, ,  
11 maternal smoking during pregnancy, average annual NO<sub>2</sub> exposure at birth address, birthweight, indoor SHS at 1 year (except in models with SHS exposure), use of gas for  
12 cooking at 3 months, dampness or mold in the child's home at 1 year (except in models with dampness or mold exposure), pets in the home at 1 year(except in models with  
13 pet exposure), respiratory infections in the past 3 weeks before medical examination.

| N=463                               |  | % Difference in FEV <sub>1</sub> (95% CI) |                         | % Difference in FEV <sub>1</sub> growth/year (95% CI) |
|-------------------------------------|--|-------------------------------------------|-------------------------|-------------------------------------------------------|
| SHS                                 |  | AGE 12                                    | AGE 16                  |                                                       |
| Early life vs Very low              |  | -1.20 (-2.85 to 0.48 )                    | 0.78 (-0.90 to 2.48 )   | 0.34 (0.02 to 0.66 )                                  |
| Persistently low vs Very low        |  | -2.23 (-4.14 to -0.28 )                   | -1.25 (-3.14 to 0.68 )  | 0.21 (-0.16 to 0.58 )                                 |
| Childhood vs Very low               |  | -0.77 (-2.54 to 1.02 )                    | -1.13 (-2.87 to 0.64 )  | -0.38 (-0.71 to -0.05 )                               |
| Pets                                |  |                                           |                         |                                                       |
| Early life vs Very low              |  | -0.05 (-1.51 to 1.43 )                    | 0.46 (-0.99 to 1.92 )   | -0.03 (-0.30 to 0.24 )                                |
| Mid-childhood vs Very low           |  | 1.60 (-0.11 to 3.35 )                     | 1.05 (-0.63 to 2.76 )   | -0.10 (-0.41 to 0.21 )                                |
| Late childhood vs Very low          |  | 2.75 (1.23 to 4.29 )                      | 4.84 (3.32 to 6.39 )    | 0.38 (0.10 to 0.65 )                                  |
| Persistently high vs Very low       |  | 1.42 (0.26 to 2.60 )                      | 1.00 (-0.15 to 2.16 )   | -0.30 (-0.51 to -0.09 )                               |
| Dampness or mold                    |  |                                           |                         |                                                       |
| Early life vs Very low              |  | 2.48 (0.84 to 4.14 )                      | 0.35 (-1.25 to 1.98 )   | -0.71 (-1.01 to -0.42 )                               |
| Moderate late childhood vs Very low |  | -2.97 (-4.36 to -1.56 )                   | -2.97 (-4.36 to -1.56 ) | 0.01 (-0.25 to 0.28 )                                 |
| Mid-childhood vs Very low           |  | -1.05 (-3.44 to 1.40 )                    | -0.24 (-2.65 to 2.22 )  | -0.08 (-0.52 to 0.37 )                                |
|                                     |  | % Difference in FVC (95% CI)              |                         | % Difference in FVC growth/year (95% CI)              |
|                                     |  | AGE 12                                    | AGE 16                  |                                                       |
| SHS                                 |  |                                           |                         |                                                       |
| Early life vs Very low              |  | -2.37 (-3.91 to -0.80 )                   | -0.86 (-2.27 to 0.57 )  | 0.25 (-0.06 to 0.56 )                                 |
| Persistently low vs Very low        |  | -1.68 (-3.50 to 0.18 )                    | -0.63 (-2.26 to 1.03 )  | 0.17 (-0.20 to 0.53 )                                 |
| Childhood vs Very low               |  | -2.00 (-3.65 to -0.32 )                   | -1.23 (-2.72 to 0.28 )  | -0.05 (-0.38 to 0.28 )                                |
| Pets                                |  |                                           |                         |                                                       |
| Early life vs Very low              |  | 0.70 (-0.69 to 2.11 )                     | -0.10 (-1.34 to 1.14 )  | -0.29 (-0.56 to -0.03 )                               |
| Mid-childhood vs Very low           |  | 0.30 (-1.31 to 1.93 )                     | 0.07 (-1.37 to 1.52 )   | 0.00 (-0.31 to 0.31 )                                 |
| Late childhood vs Very low          |  | 2.31 (0.87 to 3.76 )                      | 2.19 (0.91 to 3.48 )    | -0.17 (-0.44 to 0.10 )                                |
| Persistently high vs Very low       |  | 1.08 (-0.02 to 2.19 )                     | 0.24 (-0.74 to 1.23 )   | -0.37 (-0.57 to -0.16 )                               |
| Dampness or mold                    |  |                                           |                         |                                                       |
| Early life vs Very low              |  | 3.03 (1.48 to 4.61 )                      | 1.09 (-0.28 to 2.48 )   | -0.60 (-0.89 to -0.31 )                               |
| Moderate late childhood vs Very low |  | -2.29 (-3.62 to -0.95 )                   | -3.05 (-4.22 to -1.85 ) | -0.14 (-0.40 to 0.12 )                                |
| Mid-childhood vs Very low           |  | 0.72 (-1.58 to 3.08 )                     | -0.20 (-2.25 to 1.88 )  | -0.60 (-0.89 to -0.31 )                               |

**Table E12. Adjusted associations of longitudinal patterns of SHS, pet, and dampness or mold exposure with FEV<sub>1</sub> and FVC at ages 12 and 16 and FEV<sub>1</sub> and FVC growth between age 12 and 16 excluding smokers(N=44). Associations are presented as percent difference in (growth of) FEV<sub>1</sub> and FVC.**



17 Adjusted for sex, log transformations of height, weight and age at medical examination, parental education, maternal and paternal allergy, breastfeeding at 12 weeks, ,  
18 maternal smoking during pregnancy, average annual NO<sub>2</sub> exposure at birth address, birthweight, indoor SHS at 1 year (except in models with SHS exposure), use of gas for  
19 cooking at 3 months, dampness or mold in the child's home at 1 year (except in models with dampness or mold exposure), pets in the home at 1 year(except in models with  
20 pet exposure), respiratory infections in the past 3 weeks before medical examination.

21

|                                     | Odds ratios (95% CI) |                      |
|-------------------------------------|----------------------|----------------------|
|                                     | Any asthma           | Any rhinitis         |
|                                     | (N=525)              | (N=256)              |
| <b>Pets</b>                         |                      |                      |
| Very low vs Late childhood          | 2.10 (0.70 to 6.36)  | 1.50 (0.51 to 4.37)  |
| Early life vs Late childhood        | 2.79 (0.82 to 9.49)  | 2.60 (0.71 to 9.45)  |
| Mid-childhood vs Late childhood     | 1.09 (0.23 to 5.24)  | 0.57 (0.11 to 2.91)  |
| Persistently high vs Late childhood | 3.17 (1.03 to 9.75)  | 0.51 (0.15 to 1.74)  |
| <b>Cats</b>                         | (N=525)              | (N=256)              |
| Very low vs Late childhood          | 5.61 (0.74 to 42.37) | 4.07 (0.47 to 34.78) |
| Early life vs Late childhood        | 3.81 (0.42 to 33.29) | 4.59 (0.40 to 51.06) |
| Persistently high vs Late childhood | 5.94 (0.73 to 48.08) | 1.75 (0.17 17.2)     |
| <b>Rodents</b>                      | (N=525)              | (N=256)              |
| Very low vs Late childhood          | 1.10 (0.54 to 2.24)  | 2.39 (1.00 to 5.70)  |
| Early life vs Late childhood        | 1.23 (0.34 to 4.40)  | 1.06(0.16 to 6.82)   |
| Mid-childhood vs Late childhood     | 0.99 (0.25 to 3.96)  | 2.93 (0.56 to 15.34) |

22

23 **Table E13. Associations of childhood asthma and rhinitis during the first 8 years of life with exposure pattern**  
24 **membership vs late childhood membership, for pet exposure and separately for cats and rodent exposure.**  
25 **Associations are presented as odds ratios.**

26 Adjusted for sex, log transformations of height, weight and age at medical examination, parental education,  
27 maternal and paternal allergy, breastfeeding at 12 weeks, maternal smoking during pregnancy, average annual  
28 NO<sub>2</sub> exposure at birth address, birthweight, indoor SHS at 1 year, use of gas for cooking at 3 months, dampness  
29 or mold in the child’s home at 1 year, respiratory infections in the past 3 weeks before medical examination.

30

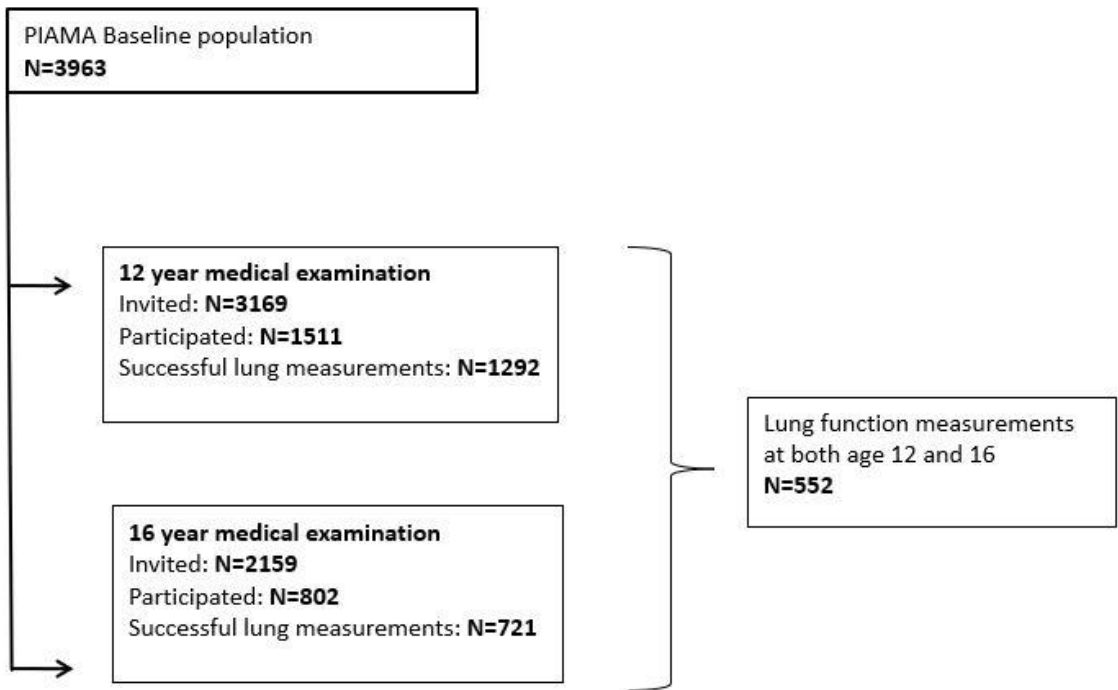

31  
32 **Figure E1. Flow diagram of study population from the baseline population**

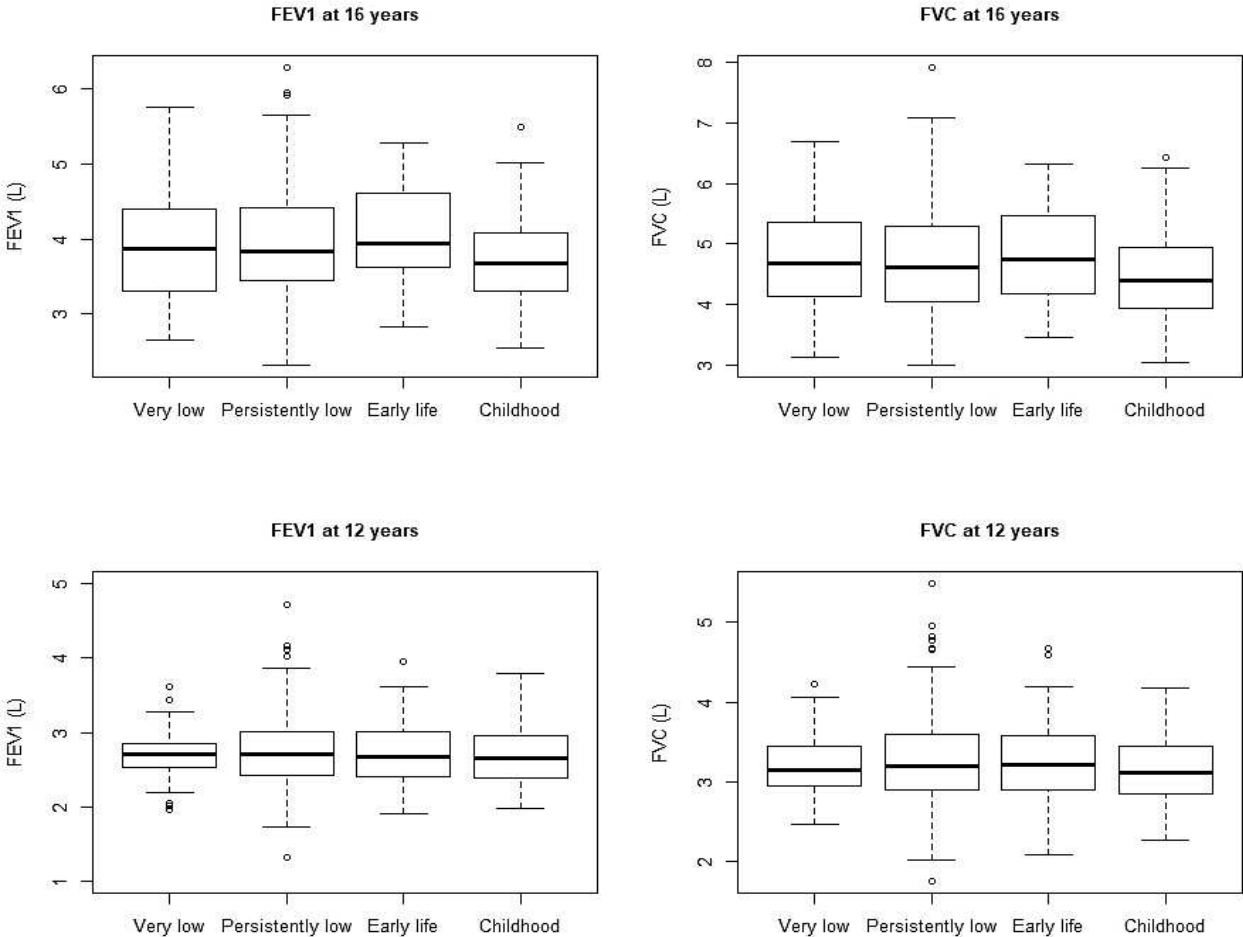

Figure E2. Boxplots of FEV<sub>1</sub> and FVC values vs patterns of secondhand smoke (SHS) exposure. \*Allocation to exposure pattern based on the largest posteriori probability

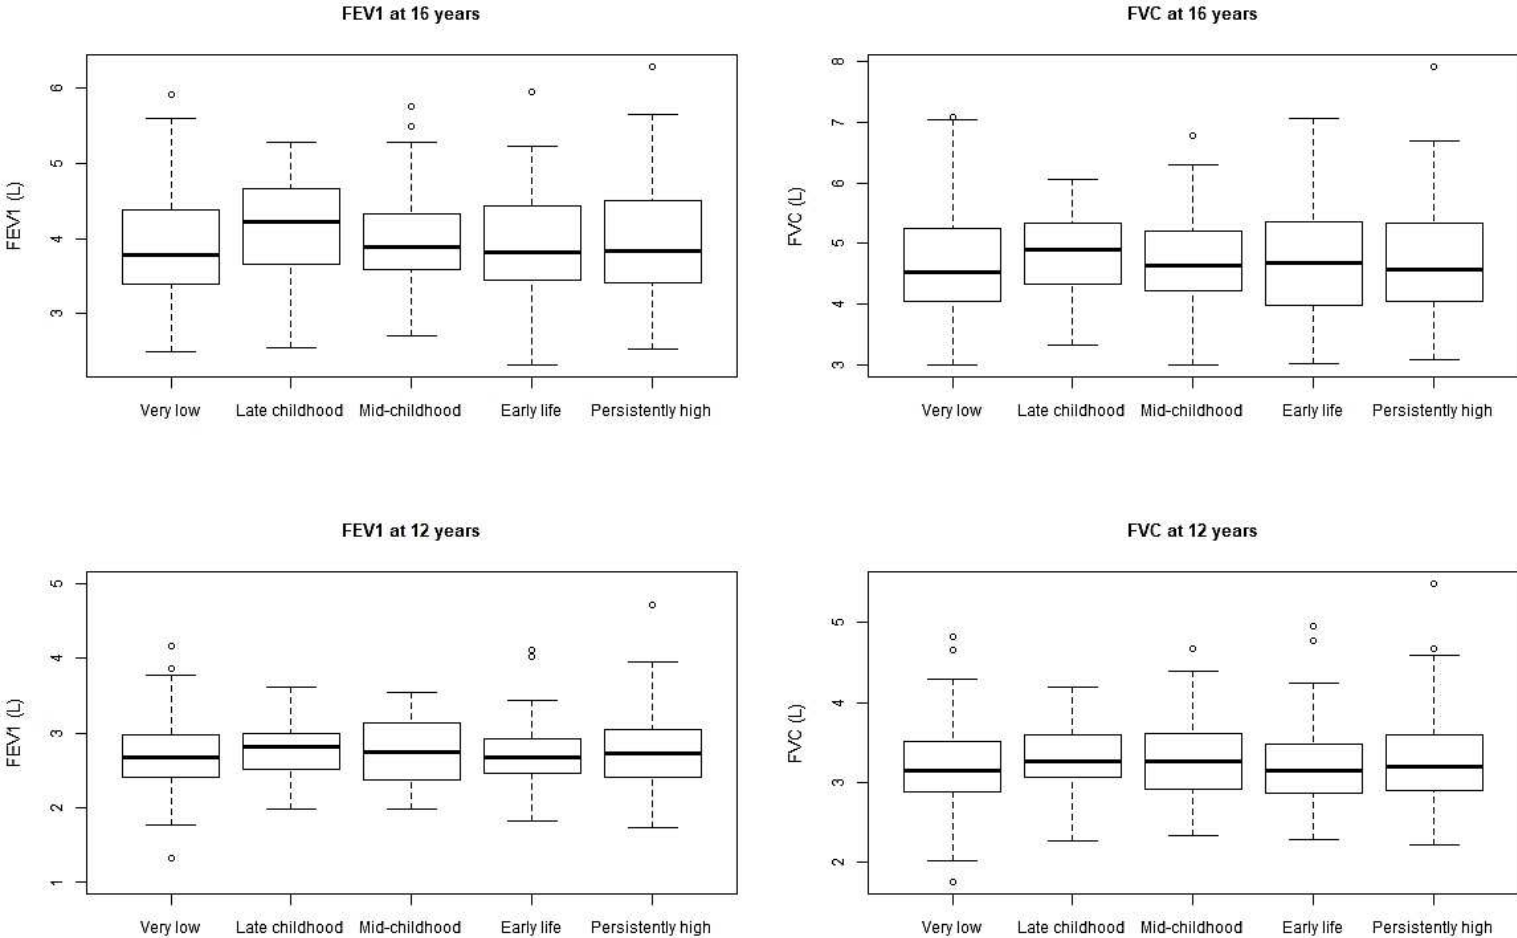

Figure E3. Boxplots of FEV<sub>1</sub> and FVC values vs pattern of for pet exposure. \*Allocation to exposure pattern based on the largest posteriori probability

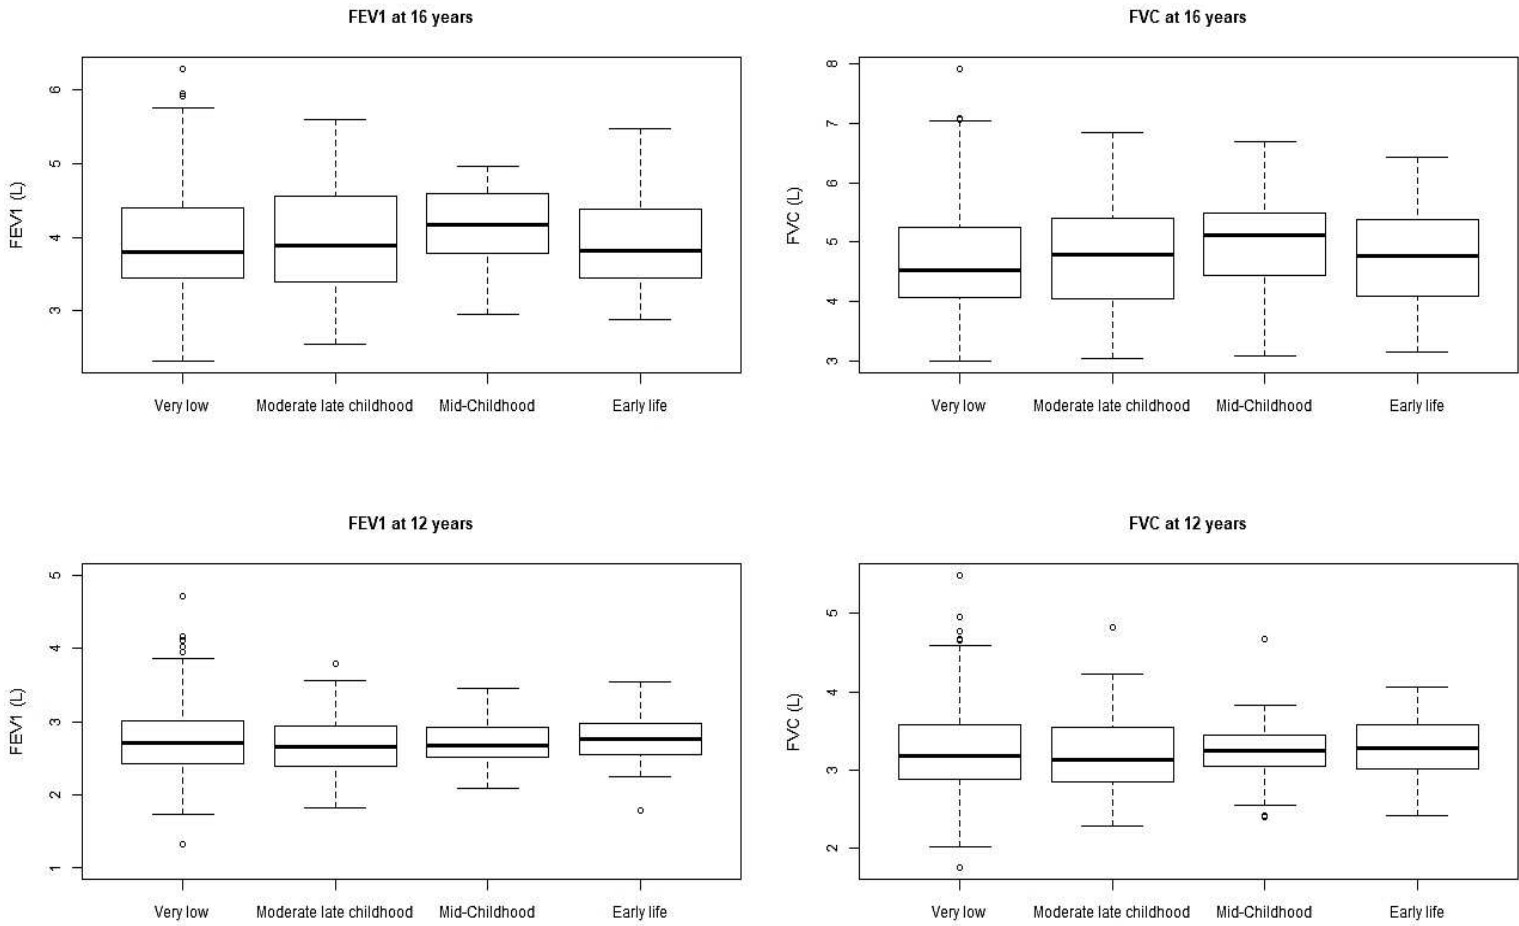

Figure E4. Boxplots of FEV1 and FVC values vs pattern of dampness or mold exposure. \*Allocation to exposure pattern based on the largest posteriori probability

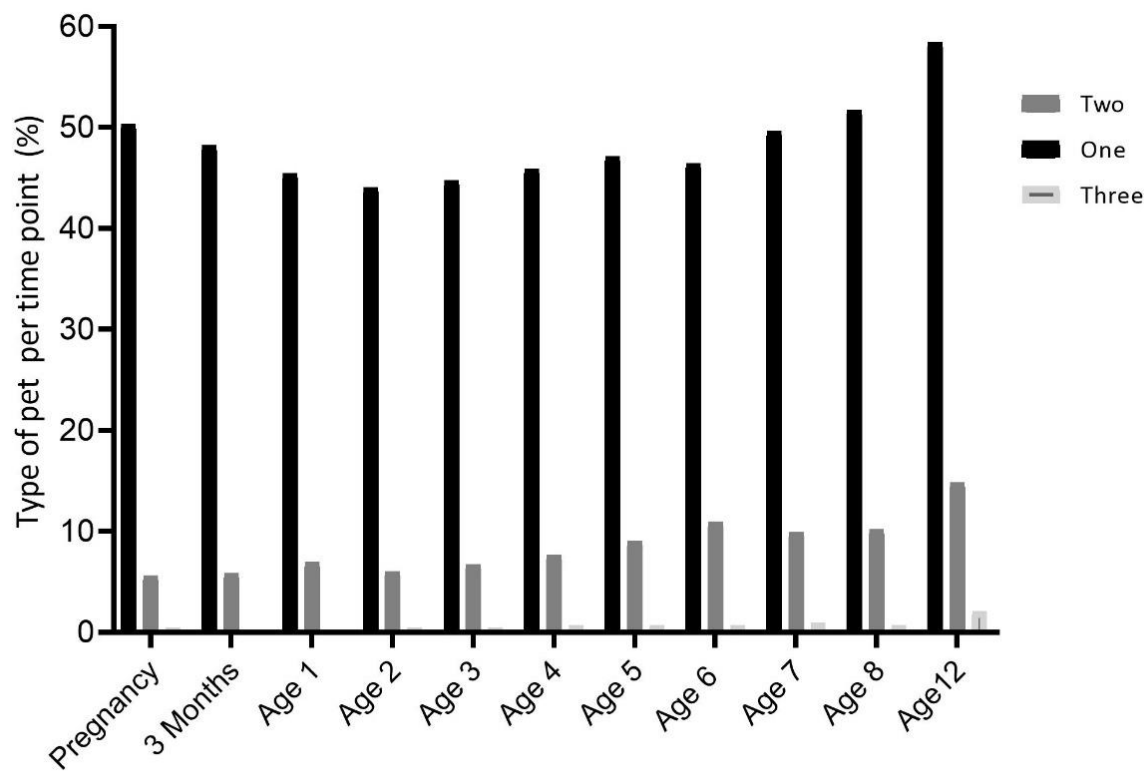

Figure E5: Number of different pets (cat, dog, rodent) owned per time point.
